# Supplementary material for: Targeting IL13Ralpha2 activates STAT6-TP63 pathway to suppress breast cancer lung metastasis
Source: Springer Nature journal article supplement (doi:10.1186/s13058-015-0607-y), 2015-07-24

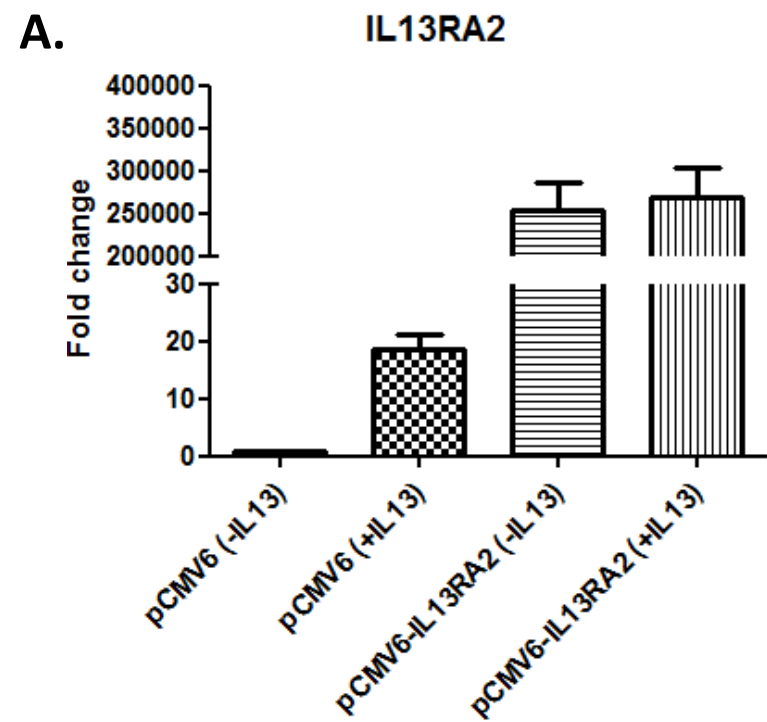

**B.** pCMV6 + + - -  
 pCMV6-IL13RA2 - - + +  
 IL-13 - + - +  
 1 5.9 1.4 1

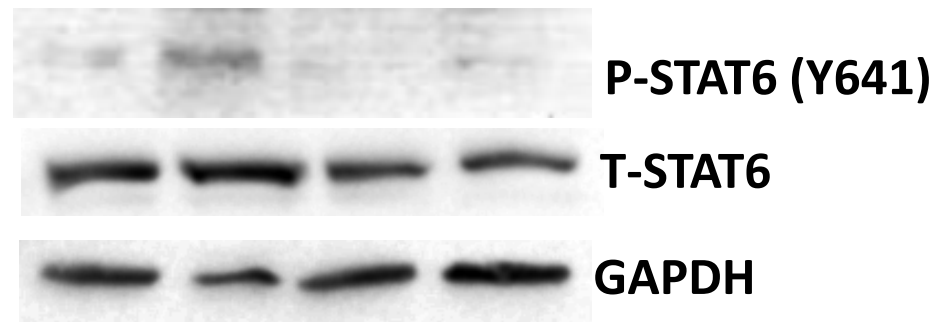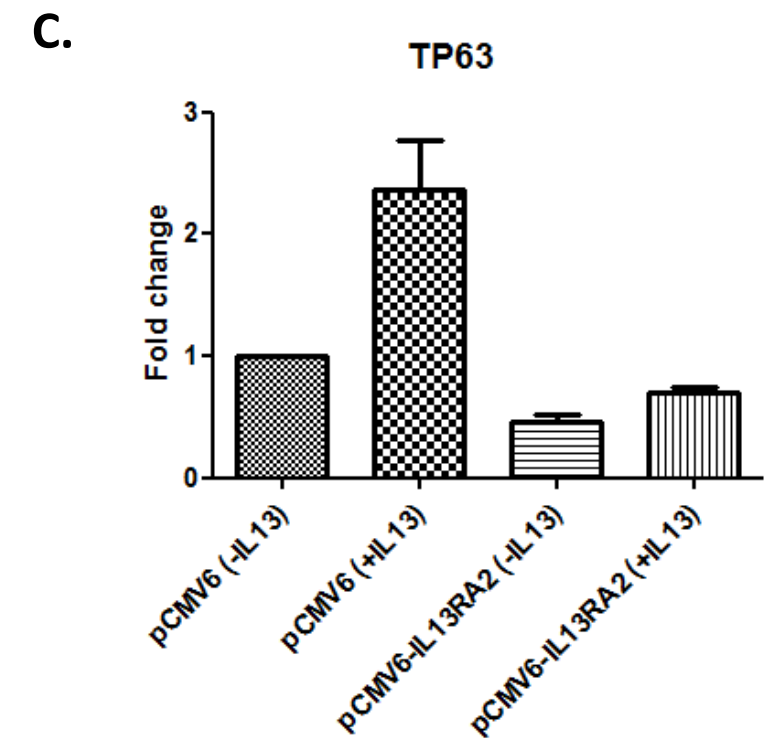

**D.** pCMV6 + + - -  
 pCMV6-IL13RA2 - - + +  
 IL-13 - + - +  
 1 1.3 0.4 0.6

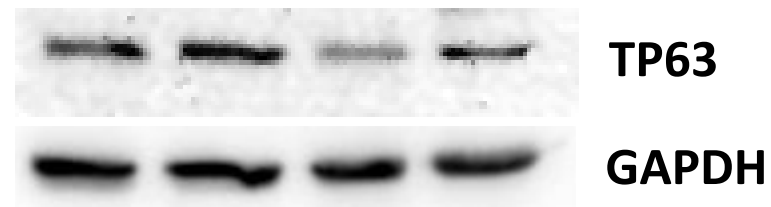

Supplement: MOESM6 [file 9781510]
