# Supplementary material for: Targeting IL13Ralpha2 activates STAT6-TP63 pathway to suppress breast cancer lung metastasis
Source: Springer Nature journal article supplement (doi:10.1186/s13058-015-0607-y), 2015-07-24
Supplement: MOESM7 [file 9781510]

**shSCR**

**shIL13RA2**

**SF**

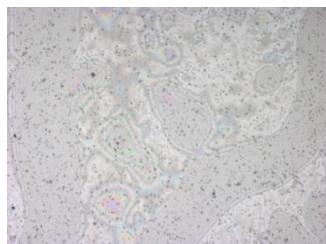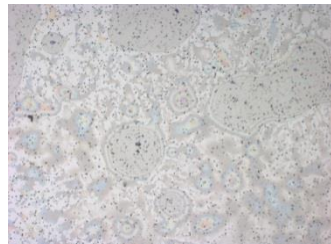

**10%  
FBS**

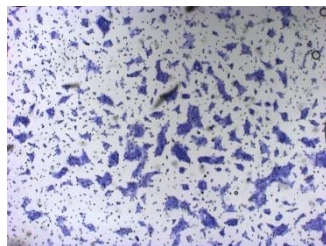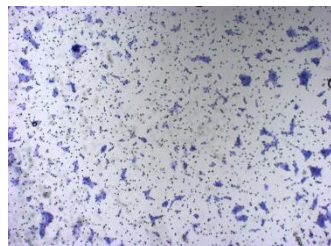

**- IL13**

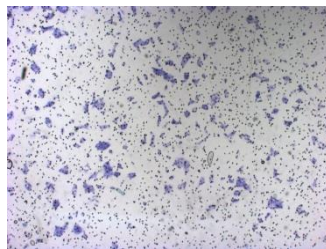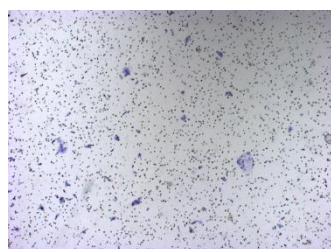

**+ IL13**
