# Supplementary material for: Targeting IL13Ralpha2 activates STAT6-TP63 pathway to suppress breast cancer lung metastasis
Source: Springer Nature journal article supplement (doi:10.1186/s13058-015-0607-y), 2015-07-24
Supplement: MOESM11 [file 9781510]

**Suppl. Table 1: shSCR (-IL13) VS shSCR (+IL13)**

| Upregulated | Fold change | Downregulated | Fold change |
|-------------|-------------|---------------|-------------|
| SERPINB4    | 25.18886131 | CASP14        | -2.717061   |
| SERPINB3    | 14.73262907 | AGR2          | -2.357287   |
| TNFAIP6     | 3.646856671 | TMEM45A       | -2.295109   |
| CCL26       | 3.236737797 | RNU4-2        | -2.128151   |
| PDCD1LG2    | 3.20739603  | LOC285456     | -2.110632   |
| SIDT1       | 2.776661865 | VTCN1         | -2.104689   |
| CA2         | 2.754480024 | CEACAM6       | -2.049327   |
| SLC28A3     | 2.701375138 | LOC100134868  | -2.003656   |
| ABCC2       | 2.623712242 |               |             |
| FAP         | 2.597126885 |               |             |
| GCNT3       | 2.594683376 |               |             |
| LRAT        | 2.523911809 |               |             |
| SERPINB13   | 2.441599378 |               |             |
| IL13RA2     | 2.406963893 |               |             |
| SLIT2       | 2.213663601 |               |             |
| SLC26A2     | 2.210708796 |               |             |
| TP63        | 2.128176049 |               |             |
| DPYD        | 2.080073489 |               |             |
| RNU5B-1     | 2.031664244 |               |             |
| DNASE2B     | 2.017610935 |               |             |
