# Supplementary material for: Targeting IL13Ralpha2 activates STAT6-TP63 pathway to suppress breast cancer lung metastasis
Source: Springer Nature journal article supplement (doi:10.1186/s13058-015-0607-y), 2015-07-24
Supplement: MOESM12 [file 9781510]

**Suppl. Table 2: shSCR (-IL13) VS shIL13RA2 (-IL13)**

| Upregulated | Fold change | Downregulated | Fold change |
|-------------|-------------|---------------|-------------|
| CASP14      | 5.960467539 | IL13RA2       | -3.13395    |
| SULT1E1     | 3.536197861 | RNU4-2        | -2.476196   |
| GPX2        | 3.093075395 | CXCL17        | -2.175239   |
| TMPRSS15    | 3.042368697 | PSPH          | -2.166544   |
| CEACAM5     | 3.007237894 | SERPINA1      | -2.160342   |
| LOC644714   | 2.532040534 | ZNF487P       | -2.143314   |
| MLLT3       | 2.430252979 | ARL14         | -2.006565   |
| PLCB1       | 2.426222734 |               |             |
| LOC400986   | 2.426124355 |               |             |
| BICC1       | 2.409466095 |               |             |
| LPHN3       | 2.3955742   |               |             |
| CLCA2       | 2.385970987 |               |             |
| CDH19       | 2.363531349 |               |             |
| C3orf57     | 2.33407513  |               |             |
| ADAD2       | 2.31116298  |               |             |
| TP63        | 2.283371338 |               |             |
| SULT1B1     | 2.257993761 |               |             |
| MAP2        | 2.253182232 |               |             |
| ANKRD11     | 2.252798846 |               |             |
| GAGE12J     | 2.20802652  |               |             |
| ZNF711      | 2.165771441 |               |             |
| RASA4       | 2.144327852 |               |             |
| HPGD        | 2.13836629  |               |             |
| RXFP1       | 2.090209428 |               |             |
| COL12A1     | 2.046721065 |               |             |
| GCRG224     | 2.040495459 |               |             |
| TAS2R4      | 2.026289065 |               |             |
| SERPINB4    | 2.007797819 |               |             |
| MME         | 2.006515777 |               |             |
